# Supplementary material
Source: publisher figshare collection journal article supplement (https://acs.figshare.com/ndownloader/files/4135279)
Supplement: Supplementary file 1 [file 4135279]

## Supporting Information

### Ionic liquid mediated sol-gel synthesis in the presence of water or formic acid : which synthesis for which material?

Lydie Viau,<sup>\*a</sup> Marie-Alexandra Néouze,<sup>b</sup> Christine Biolley,<sup>a</sup> Sabrina Volland,<sup>a</sup> David Brevet,<sup>a</sup> Philippe Gaveau,<sup>a</sup> Philippe Dieudonné,<sup>c</sup> Anne Galarneau,<sup>b</sup> and André Vioux<sup>\*a</sup>

<sup>a</sup> Institut Charles Gerhardt de Montpellier, UMR 5253 CNRS- UM2- ENSCM- UM1, Université Montpellier 2, cc 1701, F34095 Montpellier, France ; E-mail : [vioux@univ-montp2.fr](mailto:vioux@univ-montp2.fr)

<sup>b</sup> Institute of Materials Chemistry; Vienna University of Technology; 1060 Wien, Austria

<sup>c</sup> Laboratoire Charles Coulomb (UMR CNRS 5521), Université Montpellier 2, 34095 Montpellier Cedex 5, France

#### Experimental section

*Stability of [C<sub>4</sub>MIm][PF<sub>6</sub>] in HCOOH :*

##### Sample preparation

The stability was tested using the same molar ratio as those used in the ionogel synthesis. In a Vial, 238 mg (0.84 mmol) of [C<sub>4</sub>MIm][PF<sub>6</sub>] were dissolved in 0.5 mL HCOOH (13.2 mmol). The mixture was stirred for 48h at room temperature while samples for NMR measurements were taken periodically.

##### NMR spectroscopy

The <sup>19</sup>F and <sup>31</sup>P spectra were recorded using a Bruker Avance 400 MHz (9.4 T) spectrometer using CD<sub>3</sub>CN or D<sub>2</sub>O as solvents at a frequency of 376.5 MHz (<sup>19</sup>F) and 161.97 MHz (<sup>31</sup>P).

Small angle X Ray scattering (SAXS) experiments were performed with an in-house setup of the *Laboratoire Charles Coulomb, "Réseau X et gamma", Université Montpellier 2,*

France. A high brightness low power X- ray tube, coupled with aspheric multilayer optic (GeniX<sup>3D</sup> from Xenocs) was employed. It delivers an ultralow divergent beam (0.5mrad). Scatterless slits were used to give a clean 0.8mm beam diameter (35 Mphotons/s) at the sample. We worked in a transmission configuration and scattered intensity was measured by a Schneider 2D imageplate detector prototype, at a distance of 1,9m from the sample. Intensities were corrected by transmission and the empty cell contribution was substracted.

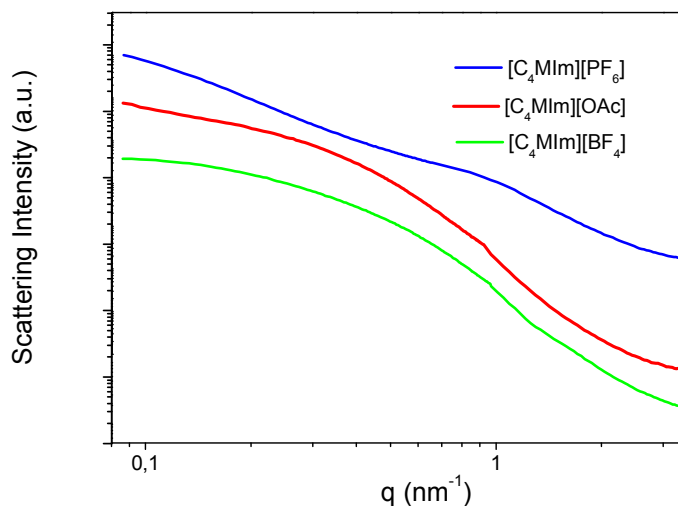

**Figure S1.** Small-angle X-ray scattering (SAXS) pattern of the washed gels obtained by the hydrolysis way.

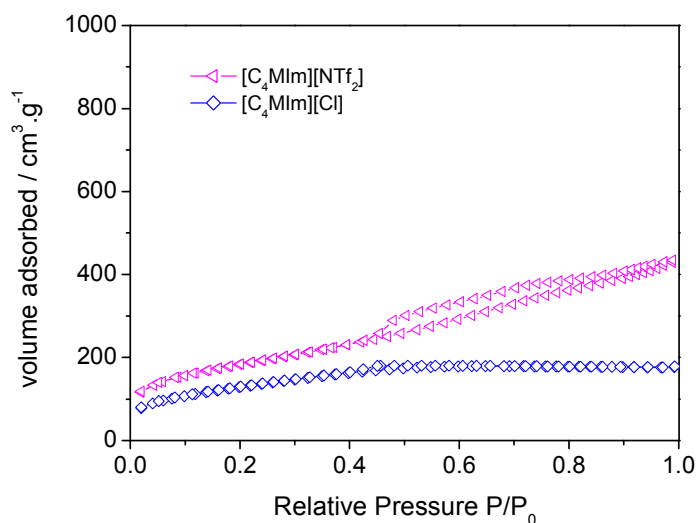

**Figure. S2.** Influence of anion in hydrolysis way: N<sub>2</sub> sorption isotherms of washed gels arising from [C<sub>4</sub>MIm][NTf<sub>2</sub>] and [C<sub>4</sub>MIm][Cl] ILs.

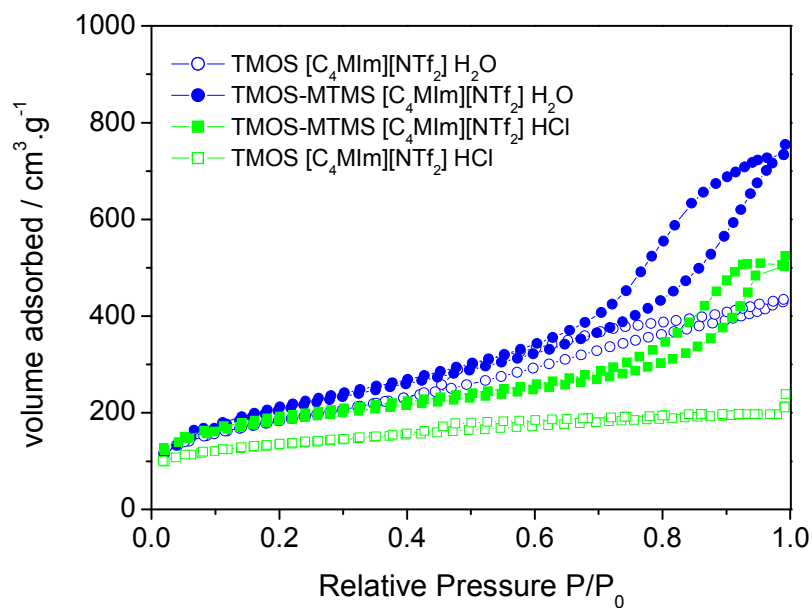

**Figure S3.** Effect of the addition of a methylated precursor in hydrolysis way: N<sub>2</sub> sorption isotherms of washed gels arising from [C<sub>4</sub>MIm] [NTf<sub>2</sub>] and 50/50 TMOS-MTMS precursor mixture.

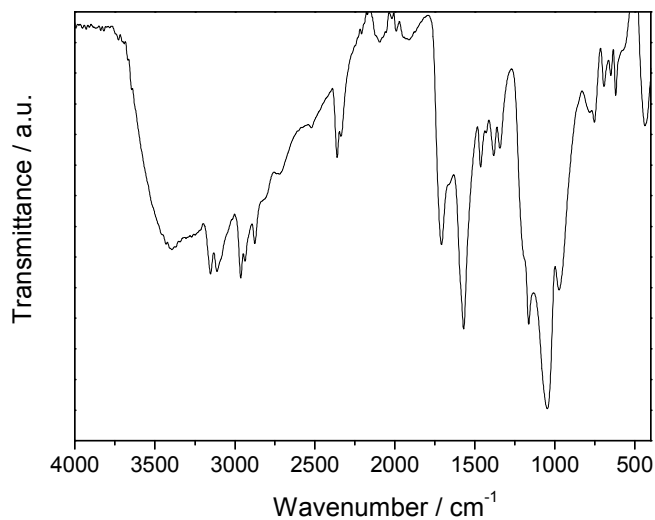

**Figure S4.** FT-IR psectra of ionogel obtained using [C<sub>4</sub>MIm][OAc] and the formic acid solvolysis

**Table S1.** Condensation extent (<sup>29</sup>Si MAS NMR) hydrolysis way

| Anion               | C % | Q <sub>2</sub> %<br>(-92 ppm) | Q <sub>3</sub> %<br>(-101 ppm) | Q <sub>4</sub> %<br>(- 110 ppm) |
|---------------------|-----|-------------------------------|--------------------------------|---------------------------------|
| [BF <sub>4</sub> ]  | 97  | -                             | 12                             | 88                              |
| [OAc]               | 90  | -                             | 40                             | 60                              |
| [PF <sub>6</sub> ]  | 95  | -                             | 20                             | 80                              |
| [Cl]                | 89  | 4                             | 35                             | 61                              |
| [NTf <sub>2</sub> ] | 87  | -                             | 35                             | 55                              |

**Table S2.** Condensation extent (<sup>29</sup>Si MAS NMR) formic acid solvolysis way

| Anion               | C % | Q <sub>2</sub> %<br>(-92 ppm) | Q <sub>3</sub> %<br>(-101 ppm) | Q <sub>4</sub> %<br>(- 110 ppm) |
|---------------------|-----|-------------------------------|--------------------------------|---------------------------------|
| [BF <sub>4</sub> ]  | NA  |                               |                                |                                 |
| [OAc]               | 87  | 2                             | 45                             | 53                              |
| [PF <sub>6</sub> ]  | NA  |                               |                                |                                 |
| [Cl]                | 90  | -                             | 40                             | 60                              |
| [NTf <sub>2</sub> ] | 89  | 1                             | 42                             | 57                              |

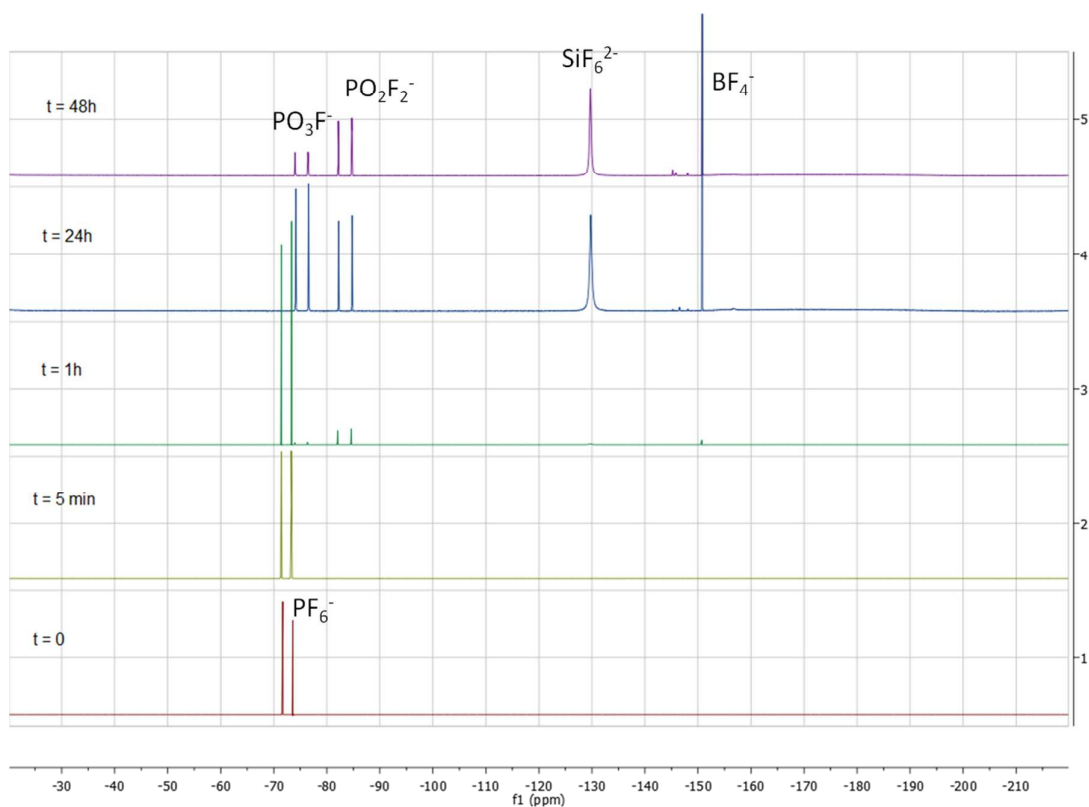

**Figure S5.**  $^{19}\text{F}$  NMR spectra of  $[\text{C}_4\text{MIm}][\text{PF}_6]$  at different time. The spectrum at  $t = 0$  was obtained in  $\text{CD}_3\text{CN}$  while the others were recorded in  $\text{D}_2\text{O}$ .

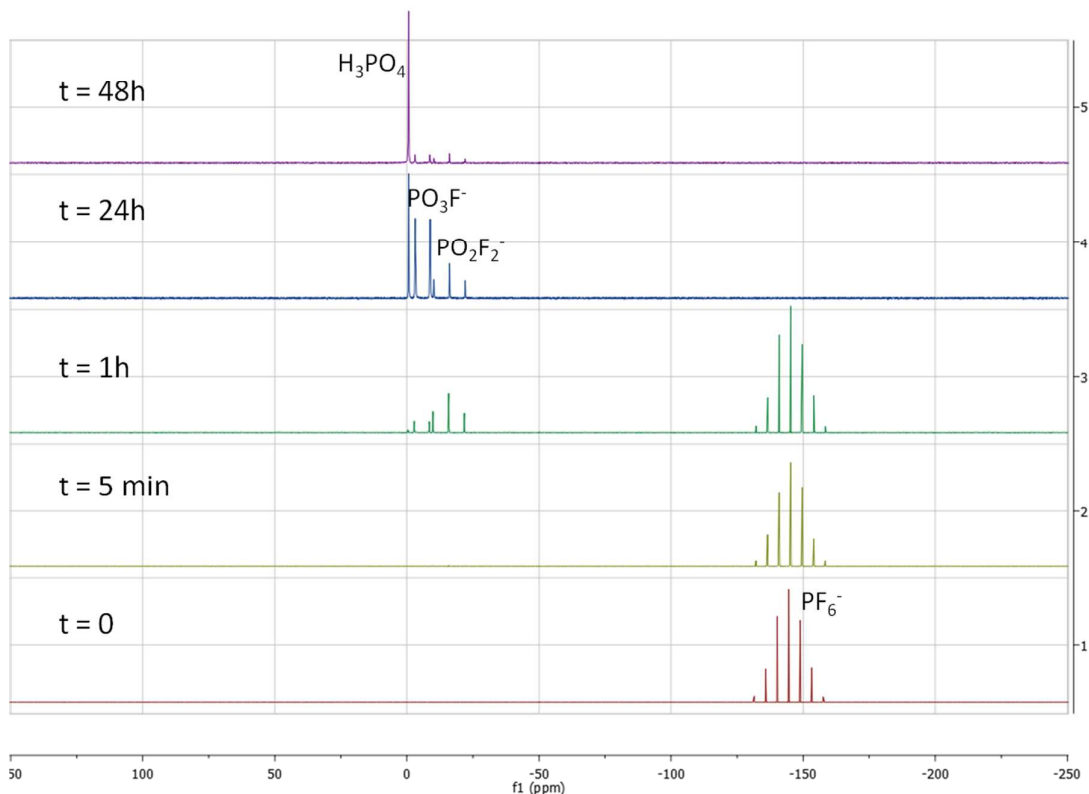

**Figure S6.**  $^{31}\text{P}$  NMR spectra of  $[\text{C}_4\text{MIm}][\text{PF}_6]$  at different time. The spectrum at  $t = 0$  was obtained in  $\text{CD}_3\text{CN}$  while the others were recorded in  $\text{D}_2\text{O}$ .

**Table S3.** Chemical shifts attribution of the species formed during the reaction of  $[\text{C}_4\text{MIm}][\text{PF}_6]$  and  $\text{HCCOH}^1$

| product                    | $^{19}\text{F}$ $\delta$ (ppm)       | $^{31}\text{P}$ $\delta$ (ppm)           |
|----------------------------|--------------------------------------|------------------------------------------|
| $\text{PF}_6^-$            | -72.6 (d, $J_{\text{F-P}} = 707$ Hz) | -144.3 (sept, $J_{\text{P-F}} = 707$ Hz) |
| $\text{PO}_3\text{F}^{2-}$ | -75.2 (d, $J_{\text{F-P}} = 911$ Hz) | -5.6 (d, $J_{\text{P-F}} = 911$ Hz)      |
| $\text{PO}_2\text{F}_2^-$  | -83.3 (d, $J_{\text{F-P}} = 960$ Hz) | -15.9 (t, $J_{\text{P-F}} = 960$ Hz)     |
| $\text{SiF}_6^{2-}$        | -129.7 (s)                           |                                          |
| $\text{BF}_4^-$            | -150.8 (s)                           |                                          |
| $\text{H}_3\text{PO}_4$    |                                      | 0                                        |

<sup>1</sup> Plakhotnyk, A. V.; Ernst, L.; Schmutzler, R. *J. Fluorine Chem.* **2005**, 126, 27-31

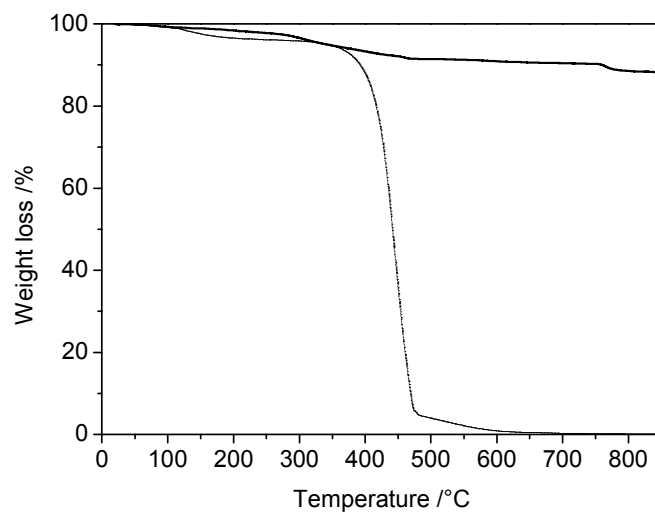

**Figure S7.** TGA of [C<sub>4</sub>MIm][BF<sub>4</sub>] (dotted lines) and washed gel after extraction of [C<sub>4</sub>MIm][BF<sub>4</sub>] (straight line) in CH<sub>3</sub>CN
